# Supplementary material
Source: publisher figshare collection journal article supplement (https://sage.figshare.com/ndownloader/files/14147783)
Supplement: Supplementary file 1 [file 14147783]

**ONLINE SUPPLEMENT**  
**STUDIES INCLUDED IN THE META-ANALYTIC REVIEW**

- Aaron, C. 2012. The relationship between individual values and psychological contracts. *Journal of Managerial Psychology*, 27: 283-301.
- Alexander, K. 2012. *Abusive supervision as a predictor of deviance and health outcomes: The exacerbating role of narcissism and social support*. Dissertation Abstracts International: Section B: The Sciences and Engineering, 72: 7731.
- Alge, B. J., Ballinger, G. A., Tangirala, S., & Oakley, J. L. 2006. Information privacy in organizations: Empowering creative and extrarole performance. *Journal of Applied Psychology*, 91: 221-232.
- Allen, T. D. 2007. The relative importance of correlates of organizational citizenship behavior and counterproductive work behavior using multiple sources of data. *Human Performance*, 21: 62-88.
- Allisey, A., Rodwell, J., & Noblet, A. 2012. Personality and the effort-reward imbalance model of stress: Individual differences in reward sensitivity. *Work & Stress*, 26: 230-251.
- Alper, E. 2007. Increasing organizational citizenship behaviors of Turkish academicians: Mediating role of trust in supervisor on the relationship between organizational justice and citizenship behaviors. *Journal of Managerial Psychology*, 22: 257-270.
- Ambrose, M. L., & Cropanzano, R. 2003. A longitudinal analysis of organizational fairness: An examination of reactions to tenure and promotion decisions. *Journal of Applied Psychology*, 88: 266-275.
- Ambrose, M. L., & Schminke, M. 2003. Organization structure as a moderator of the relationship between procedural justice, interactional justice, perceived organizational support, and supervisory trust. *Journal of Applied Psychology*, 88: 295-305.
- Ambrose, M. L., & Schminke, M. 2009. The role of overall justice judgments in organizational justice research: A test of mediation. *Journal of Applied Psychology*, 94: 491-500.
- Ambrose, M. L., Schminke, M., & Mayer, D. M. 2013. Trickle-down effects of supervisor perceptions of interactional justice: A moderated mediation approach. *Journal of Applied Psychology*, 98: 678-689.
- Anand, S., Vidyarthi, P. R., Liden, R. C., & Rousseau, D. M. 2010. Good citizens in poor-quality relationships: Idiosyncratic deals as a substitute for relationship quality. *Academy of Management Journal*, 53: 970-988.
- Andrews, M. C., & Kacmar, K. M. 2001. Discriminating among organizational politics, justice, and support. *Journal of Organizational Behavior*, 22: 347-366.
- Andrews, M. C., Kacmar, K. M., Blakely, G. L., & Bucklew, N. S. 2008. Group cohesion as an enhancement to the justice—affective commitment relationship. *Group & Organization Management*, 33: 736-755.
- Aquino, K., Galperin, B. L., & Bennett, R. J. 2004. Social status and aggressiveness as moderators of the relationship between interactional justice and workplace deviance. *Journal of Applied Social Psychology*, 34: 1001-1029.
- Aquino, K., Lewis, M. U., & Bradfield, M. 1999. Justice constructs, negative affectivity, and

- employee deviance: A proposed model and empirical test. *Journal of Organizational Behavior*, 20: 1073-1091.
- Armstrong-Stassen, M., & Schlosser, F. 2011. Perceived organizational membership and the retention of older workers. *Journal of Organizational Behavior*, 32: 319-344.
- Aryee, S., Budhwar, P. S., & Chen, Z. X. 2002. Trust as a mediator of the relationship between organizational justice and work outcomes: Test of a social exchange model. *Journal of Organizational Behavior*, 23: 267-285.
- Aryee, S., & Chay, Y. W. 2001. Workplace justice, citizenship behavior, and turnover intentions in a union context: Examining the mediating role of perceived union support and union instrumentality. *Journal of Applied Psychology*, 86: 154-160.
- Aryee, S., Chen, Z. X., Sun, L. Y., & Debrah, Y. A. 2007. Antecedents and outcomes of abusive supervision: Test of a trickle-down model. *Journal of Applied Psychology*, 92: 191-201.
- Aycan, Z., & Kabasakal, H. 2006. Social contract and perceived justice of workplace practices to cope with financial crisis. *Group & Organization Management*, 31: 469-502.
- Balducci, C., Cecchin, M., & Fraccaroli, F. 2012. The impact of role stressors on workplace bullying in both victims and perpetrators, controlling for personal vulnerability factors: A longitudinal analysis. *Work & Stress*, 26: 195-212.
- Balducci, C., Schaufeli, W. B., & Fraccaroli, F. 2011. The job demands–resources model and counterproductive work behaviour: The role of job-related affect. *European Journal of Work and Organizational Psychology*, 20: 467-496.
- Barclay, L. J., & Kiefer, T. 2014. Approach or avoid? Exploring overall justice and the differential effects of positive and negative emotions. *Journal of Management*, 40: 1857–1898.
- Barnes, C. M., Ghumman, S., & Scott, B. A. 2013. Sleep and organizational citizenship behavior: The mediating role of job satisfaction. *Journal of Occupational Health Psychology*, 18: 16-26.
- Bartol, K. M., Durham, C. C., & Poon, J. M. L. 2001. Influence of performance evaluation rating segmentation on motivation and fairness perceptions. *Journal of Applied Psychology*, 86: 1106-1119.
- Bauer, T. N., Truxillo, D. M., Sanchez, R. J., Craig, J. M., Ferrara, P., & Campion, M. A. 2001. Applicant reactions to selection: Development of the selection procedural justice scale (SPJS). *Personnel Psychology*, 54: 387-419.
- Bayram, N., Gursakal, N., & Bilgel, N. 2009. Counterproductive work behavior among white-collar employees: A study from turkey. *International Journal of Selection and Assessment*, 17: 180-188.
- Beauregard, T. A. 2014. Fairness perceptions of work–life balance initiatives: Effects on counterproductive work behaviour. *British Journal of Management*, 25: 772–789.
- Begley, T. M., Lee, C., & Hui, C. 2006. Organizational level as a moderator of the relationship between justice perceptions and work-related reactions. *Journal of Organizational Behavior*, 27: 705-721.
- Beier, S., Eib, C., Oehmann, V., Fiedler, P., & Fiedler, K. 2014. Influence of judges' behaviors on

- perceived procedural justice. *Journal of Applied Social Psychology*, 44: 46-59.
- Bell, B. S., Wiechmann, D., & Ryan, A. M. 2006. Consequences of organizational justice expectations in a selection system. *Journal of Applied Psychology*, 91: 455-466.
- Bernerth, J. B. 2005. Perceptions of justice in employment selection decisions: The role of applicant gender. *International Journal of Selection and Assessment*, 13: 206-212.
- Bernerth, J. B., Taylor, S. G., Walker, H. J., & Whitman, D. S. 2012. An empirical investigation of dispositional antecedents and performance-related outcomes of credit scores. *Journal of Applied Psychology*, 97: 469-478.
- Bertolino, M., M. Truxillo, D., & Fraccaroli, F. 2013. Age effects on perceived personality and job performance. *Journal of Managerial Psychology*, 28: 867-885.
- Bezrukova, K., Spell, C. S., & Perry, J. L. 2010. Violent splits or healthy divides? Coping with injustice through faultlines. *Personnel Psychology*, 63: 719-751.
- Bing, M. N., Stewart, S. M., Davison, H. K., Green, P. D., McIntyre, M. D., & James, L. R. 2007. An integrative typology of personality assessment for aggression: Implications for predicting counterproductive workplace behavior. *Journal of Applied Psychology*, 92: 722-744.
- Biron, M. 2010. Negative reciprocity and the association between perceived organizational ethical values and organizational deviance. *Human Relations*, 63: 875-897.
- Biswas, S., Varma, A., & Ramaswami, A. 2013. Linking distributive and procedural justice to employee engagement through social exchange: A field study in India. *The International Journal of Human Resource Management*, 24: 1570-1587.
- Blau, G. 2007. Partially testing a process model for understanding victim responses to an anticipated worksite closure. *Journal of Vocational Behavior*, 71: 401-428.
- Blau, G., & Andersson, L. 2005. Testing a measure of instigated workplace incivility. *Journal of Occupational and Organizational Psychology*, 78: 595-614.
- Bobocel, D. R. 2013. Coping with unfair events constructively or destructively: The effects of overall justice and self-other orientation. *Journal of Applied Psychology*, 98: 720-731.
- Bordia, P., Restubog, S. L. D., & Tang, R. L. 2008. When employees strike back: Investigating mediating mechanisms between psychological contract breach and workplace deviance. *Journal of Applied Psychology*, 93: 1104-1117.
- Bourdage, J. S., Lee, K., Lee, J.-H., & Shin, K.-H. 2012. Motives for organizational citizenship behavior: Personality correlates and coworker ratings of OCB. *Human Performance*, 25: 179-200.
- Bowling, N. A. 2010. Effects of job satisfaction and conscientiousness on extra-role behaviors. *Journal of Business & Psychology*, 25: 119-130.
- Bowling, N. A., Beehr, T. A., Bennett, M. M., & Watson, C. P. 2010. Target personality and workplace victimization: A prospective analysis. *Work & Stress*, 24: 140-158.
- Bowling, N. A., & Burns, G. N. 2015. Sex as a moderator of the relationships between predictor variables and counterproductive work behavior. *Journal of Business & Psychology*, 30: 193-205.
- Bowling, N. A., Burns, G. N., & Beehr, T. A. 2010. Productive and counterproductive attendance

- behavior: An examination of early and late arrival to and departure from work. *Human Performance*, 23: 305-322.
- Bowling, N. A., Burns, G. N., Stewart, S. M., & Gruys, M. L. 2011. Conscientiousness and agreeableness as moderators of the relationship between neuroticism and counterproductive work behaviors: A constructive replication. *International Journal of Selection & Assessment*, 19: 320–330.
- Bowling, N. A., & Michel, J. S. 2011. Why do you treat me badly? The role of attributions regarding the cause of abuse in subordinates' responses to abusive supervision. *Work & Stress*, 25: 309-320.
- Bowling, N. A., Wang, Q., Tang, H. Y., & Kennedy, K. D. 2010. A comparison of general and work-specific measures of core self-evaluations. *Journal of Vocational Behavior*, 76: 559-566.
- Breaux, D. M., Tepper, B. J., Carr, J. C., & Folger, R. G. 2010. An attributional analysis of employees' responses to abusive supervision. In L. L. Neider, & C. A. Schriesheim (Eds.), *Dark Side of Management*: 69-92. Charlotte: Information Age Publishing-Iap.
- Brender-Ilan, Y., & Shultz, T. 2005. Perceived fairness of the mystery customer method: Comparing two employee evaluation practices. *Employee Responsibilities & Rights Journal*, 17: 231-243.
- Broschak, J. P., & Davis-Blake, A. 2006. Mixing standard work and nonstandard deals: The consequences of heterogeneity in employment arrangements. *Academy of Management Journal*, 49: 371-393.
- Brown, G., Bemmels, B., & Barclay, L. J. 2010. The importance of policy in perceptions of organizational justice. *Human Relations*, 63: 1587-1609.
- Brown, M. E., & Treviño, L. K. 2006. Socialized charismatic leadership, values congruence, and deviance in work groups. *Journal of Applied Psychology*, 91: 954.
- Bruursema, K., Kessler, S. R., & Spector, P. E. 2011. Bored employees misbehaving: The relationship between boredom and counterproductive work behaviour. *Work & Stress*, 25: 93-107.
- Burris, E. R., Detert, J. R., & Chiaburu, D. S. 2008. Quitting before leaving: The mediating effects of psychological attachment and detachment on voice. *Journal of Applied Psychology*, 93: 912-922.
- Burt, M. M., & Ley, F. J. 2008. Affective and normative commitment to organization, supervisor, and coworkers: Do collectivist values matter? *Journal of Vocational Behavior*, 73: 404-413.
- Burton, J. P., & Hoobler, J. M. 2011. Aggressive reactions to abusive supervision: The role of interactional justice and narcissism. *Scandinavian Journal of Psychology*, 52: 389-398.
- Burton, J. P., Mitchell, T. R., & Lee, T. W. 2005. The role of self-esteem and social influences in aggressive reactions to interactional injustice. *Journal of Business and Psychology*, 20: 131-170.
- Burton, J. P., Sablinski, C. J., & Sekiguchi, T. 2008. Linking justice, performance, and citizenship via leader–member exchange. *Journal of Business and Psychology*, 23: 51-61.
- Burton, J. P., Taylor, S. G., & Barber, L. K. 2014. Understanding internal, external, and relational

- attributions for abusive supervision. *Journal of Organizational Behavior*, 35: 871-891.
- Butler, A. M., & Chung-Yan, G. A. 2011. The influence of sexual harassment frequency and perceptions of organizational justice on victim responses to sexual harassment. *European Journal of Work and Organizational Psychology*, 20: 729-754.
- Buttigieg, D. M., Deery, S. J., & Iverson, R. D. 2007. An event history analysis of union joining and leaving. *Journal of Applied Psychology*, 92: 829-839.
- Byrne, Z. S. 2005. Fairness reduces the negative effects of organizational politics on turnover intentions, citizenship behavior and job performance. *Journal of Business and Psychology*, 20: 175-200.
- Byrne, Z. S., Pitts, V. E., Wilson, C. M., & Steiner, Z. J. 2012. Trusting the fair supervisor: The role of supervisory support in performance appraisals. *Human Resource Management Journal*, 22: 129-147.
- Camerman, J., Cropanzano, R., & Vandenberghe, C. 2007. The benefits of justice for temporary workers. *Group & Organization Management*, 32: 176-207.
- Campbell, N. S., Perry, S. J., Maertz, C. P., Allen, D. G., & Griffeth, R. W. 2013. All you need is ... resources: The effects of justice and support on burnout and turnover. *Human Relations*, 66: 759-782.
- Camps, J., Decoster, S., & Stouten, J. 2012. My share is fair, so i don't care. *Journal of Personnel Psychology*, 11: 49-59.
- Carpenter, N. C., & Berry, C. M. 2014. Are counterproductive work behavior and withdrawal empirically distinct? A meta-analytic investigation. *Journal of Management*, 43: 834-863.
- Chang, C.-H., Rosen, C. C., Siemienieć, G. M., & Johnson, R. E. 2012. Perceptions of organizational politics and employee citizenship behaviors: Conscientiousness and self-monitoring as moderators. *Journal of Business and Psychology*, 27: 395-406.
- Chang, C. H., & Johnson, R. E. 2010. Not all leader-member exchanges are created equal: Importance of leader relational identity. *The Leadership Quarterly*, 21: 796-808.
- Chang, C.-H., Johnson, R. E., & Yang, L.-Q. 2007. Emotional strain and organizational citizenship behaviours: A meta-analysis and review. *Work & Stress*, 21: 312-332.
- Chang, C. H., & Lyons, B. J. 2012. Not all aggressions are created equal: A multifoci approach to workplace aggression. *Journal of Occupational Health Psychology*, 17: 79-92.
- Chang, C. S. 2015. Relationships of organizational justice and organizational constraints with performance: A meta-analysis (Doctoral dissertation, Bowling Green State University).
- Chang, E. 2002. Distributive justice and organizational commitment revisited: Moderation by layoff in the case of Korean employees. *Human Resource Management*, 41: 261-270.
- Chang, K., Kuo, C. C., Su, M., & Taylor, J. 2013. Dis-identification in organizations and its role in the workplace. *Industrial Relations/Relations Industrielles*, 68, 479-506.
- Chen, C. C., & Chiu, S. F. 2008. An integrative model linking supervisor support and organizational citizenship behavior. *Journal of Business and Psychology*, 23: 1-10.
- Chen, Z. X., Tsui, A. S., & Zhong, L. 2008. Reactions to psychological contract breach: A dual perspective. *Journal of Organizational Behavior*, 29: 527-548.
- Chi, N. W., & Han, T. S. 2011. Exploring the linkages between formal ownership and

- psychological ownership for the organization: The mediating role of organizational justice. *Journal of Occupational & Organizational Psychology*, 81: 691-711.
- Chi, S.-C. S., & Liang, S.-G. 2013. When do subordinates' emotion-regulation strategies matter? Abusive supervision, subordinates' emotional exhaustion, and work withdrawal. *The Leadership Quarterly*, 24: 125-137.
- Chien, M. S., & Lin, C.-C. 2013. Psychological contract framework on the linkage between developmental human resource configuration and role behavior. *The International Journal of Human Resource Management*, 24: 1-14.
- Chiu, S. F., & Peng, J. C. 2008. The relationship between psychological contract breach and employee deviance: The moderating role of hostile attributional style. *Journal of Vocational Behavior*, 73: 426-433.
- Cho, J., & Dansereau, F. 2010. Are transformational leaders fair? A multi-level study of transformational leadership, justice perceptions, and organizational citizenship behaviors. *The Leadership Quarterly*, 21: 409-421.
- Chrobot-Mason, D., & Hepworth, W. K. 2005. Examining perceptions of ambiguous and unambiguous threats of racial harassment and managerial response strategies1. *Journal of Applied Social Psychology*, 35: 2215-2261.
- Cohen, A., & Keren, D. 2008. Individual values and social exchange variables: Examining their relationship to and mutual effect on in-role performance and organizational citizenship behavior. *Group & Organization Management: An International Journal*, 33: 425-452.
- Cohen, A., & Kol, Y. 2004. Professionalism and organizational citizenship behavior: An empirical examination among israeli nurses. *Journal of Managerial Psychology*, 19: 386-405.
- Cohen-Charash, Y., & Spector, P. E. 2001. The role of justice in organizations: A meta-analysis. *Organizational Behavior and Human Decision Processes*, 86: 278-321.
- Cojuharencu, I., & Patient, D. 2013. Workplace fairness versus unfairness: Examining the differential salience of facets of organizational justice. *Journal of Occupational and Organizational Psychology*, 86: 371-393.
- Colbert, A. E., Mount, M. K., Harter, J. K., Witt, L. A., & Barrick, M. R. 2004. Interactive effects of personality and perceptions of the work situation on workplace deviance. *Journal of Applied Psychology*, 89: 599-609.
- Colquitt, J. A. 2001. On the dimensionality of organizational justice: A construct validation of a measure. *Journal of Applied Psychology*, 86: 386-400.
- Colquitt, J. A., Long, D. M., Rodell, J. B., & Halvorsen-Ganepola, M. D. 2015. Adding the "in" to justice: A qualitative and quantitative investigation of the differential effects of justice rule adherence and violation. *Journal of Applied Psychology*, 100: 278-294.
- Colquitt, J. A., & Rodell, J. B. 2011. Justice, trust, and trustworthiness: A longitudinal analysis integrating three theoretical perspectives. *Academy of Management Journal*, 54: 1183-1206.
- Conlon, D. E. 1993. Some tests of the self-interest and group-value models of procedural justice: Evidence from an organizational appeal procedure. *Academy of Management Journal*, 36: 1109-1124.

- Cortina, L. M., & Magley, V. J. 2003. Raising voice, risking retaliation: Events following interpersonal mistreatment in the workplace. *Journal of Occupational Health Psychology*, 8: 247-265.
- Coyle-Shapiro, A. M. 2002. A psychological contract perspective on organizational citizenship behavior †. *Journal of Organizational Behavior*, 23: 927-946.
- Coyne, I., Gentile, D., Born, M. P., Ersoy, N. C., & Vakola, M. 2013. The relationship between productive and counterproductive work behaviour across four European countries. *European Journal of Work and Organizational Psychology*, 22: 377-389.
- Crocetti, E., Avanzi, L., Hawk, S. T., Fraccaroli, F., & Meeus, W. 2014. Personal and social facets of job identity: A person-centered approach. *Journal of Business and Psychology*, 29: 281-300.
- Cropanzano, R., Li, A., & Lehman Benson, I. 2011. Peer justice and teamwork process. *Group & Organization Management*, 36: 567-596.
- Cropanzano, R., Prehar, C. A., & Chen, P. Y. 2002. Using social exchange theory to distinguish procedural from interactional justice. *Group & Organization Management*, 27: 324-351.
- Cropanzano, R., Rupp, D. E., & Byrne, Z. S. 2003. The relationship of emotional exhaustion to work attitudes, job performance, and organizational citizenship behaviors. *Journal of Applied Psychology*, 88: 160-169.
- Cropanzano, R., Slaughter, J. E., & Bachiochi, P. D. 2005. Organizational justice and black applicants' reactions to affirmative action. *Journal of Applied Psychology*, 90: 1168-1184.
- Dahling, J. J., Chau, S. L., Mayer, D. M., & Gregory, J. B. 2012. Breaking rules for the right reasons? An investigation of pro-social rule breaking. *Journal of Organizational Behavior*, 33: 21-42.
- Dahling, J. J., Whitaker, B. G., & Levy, P. E. 2009a. The development and validation of a new Machiavellianism scale. *Journal of Management*, 35: 219-257.
- Daileyl, R. C., & Kirk, D. J. 1992. Distributive and procedural justice as antecedents of job dissatisfaction and intent to turnover. *Human Relations*, 45: 305-317.
- Dalal, R. S. 2005. A meta-analysis of the relationship between organizational citizenship behavior and counterproductive work behavior. *Journal of Applied Psychology*, 90: 1241-1255.
- Dalal, R. S., Baysinger, M., Brummel, B. J., & Lebreton, J. M. 2012. The relative importance of employee engagement, other job attitudes, and trait affect as predictors of job performance. *Journal of Applied Social Psychology*, 42: E295-E325.
- David De, C. 2005. Procedural and distributive justice effects moderated by organizational identification. *Journal of Managerial Psychology*, 20: 4-13.
- De Cremer, D., Van Dijke, M., & Bos, A. E. R. 2007. When leaders are seen as transformational: The effects of organizational justice<sup>1</sup>. *Journal of Applied Social Psychology*, 37: 1797-1816.
- De Haas, S., Timmerman, G., & Höing, M. 2009. Sexual harassment and health among male and female police officers. *Journal of Occupational Health Psychology*, 14: 390-401.
- De Winne, S., Delmotte, J., Gilbert, C., & Sels, L. 2013. Comparing and explaining HR department effectiveness assessments: Evidence from line managers and trade union

- representatives. *The International Journal of Human Resource Management*, 24: 1708-1735.
- Decoster, S., Camps, J., Stouten, J., Vandevyvere, L., & Tripp, T. M. 2013. Standing by your organization: The impact of organizational identification and abusive supervision on followers' perceived cohesion and tendency to gossip. *Journal of Business Ethics*, 118: 623-634.
- Decoster, S., Stouten, J., Camps, J., & Tripp, T. M. 2014. The role of employees' OCB and leaders' hindrance stress in the emergence of self-serving leadership. *The Leadership Quarterly*, 25: 647-659.
- Delmotte, J., De Winne, S., & Sels, L. 2012. Toward an assessment of perceived hrn system strength: Scale development and validation. *The International Journal of Human Resource Management*, 23: 1481-1506.
- Detert, J. R., Treviño, L. K., Burris, E. R., & Andiappan, M. 2007. Managerial modes of influence and counterproductivity in organizations: A longitudinal business-unit-level investigation. *Journal of Applied Psychology*, 92: 993-1005.
- Devonish, D., & Greenidge, D. 2010. The effect of organizational justice on contextual performance, counterproductive work behaviors, and task performance: Investigating the moderating role of ability-based emotional intelligence. *International Journal of Selection & Assessment*, 18: 75-86.
- Diefendorff, J. M., & Mehta, K. 2007. The relations of motivational traits with workplace deviance. *Journal of Applied Psychology*, 92: 967.
- Dineen, B. R., Lewicki, R. J., & Tomlinson, E. C. 2006. Supervisory guidance and behavioral integrity: Relationships with employee citizenship and deviant behavior. *Journal of Applied Psychology*, 91: 622-635.
- Drexler, J. A., Beehr, T. A., & Stetz, T. A. 2001. Peer appraisals: Differentiation of individual performance on group tasks. *Human Resource Management*, 40: 333-345.
- Duffy, M. K., & Ferrier, W. J. 2003. Birds of a feather...?:How supervisor-subordinate dissimilarity moderates the influence of supervisor behaviors on workplace attitudes. *Group & Organization Management*, 28: 217-248.
- Dunlop, P. D., & Lee, K. 2004. Workplace deviance, organizational citizenship behavior, and business unit performance: The bad apples do spoil the whole barrel. *Journal of Organizational Behavior*, 25: 67-80.
- Dupre, K. E. 2005. Beating up the boss: The prediction and prevention of interpersonal aggression targeting workplace supervisors. Dissertation Abstracts International Section A: Humanities and Social Sciences.
- Dupre, K. E., Inness, M., Connelly, C. E., Barling, J., & Hopton, C. 2006. Workplace aggression in teenage part-time employees. *Journal of Applied Psychology*, 91: 987-997.
- Dust, S. B., Resick, C. J., & Mawritz, M. B. 2014. Transformational leadership, psychological empowerment, and the moderating role of mechanistic-organic contexts. *Journal of Organizational Behavior*, 35: 413-433.
- Eby, L. T., Butts, M. M., Hoffman, B. J., & Sauer, J. B. 2015. Cross-lagged relations between



- mentoring received from supervisors and employee OCBs: Disentangling causal direction and identifying boundary conditions. *Journal of Applied Psychology*, 100: 1275-1285.
- Edwards, M. R. 2009. Hr, perceived organisational support and organisational identification: An analysis after organisational formation. *Human Resource Management Journal*, 19: 91-115.
- Edwards, M. R., & Peccei, R. 2007. Organizational identification: Development and testing of a conceptually grounded measure. *European Journal of Work and Organizational Psychology*, 16: 25-57.
- Ehrhardt, K., Shaffer, M., Chiu, W. C. K., & Luk, D. M. 2012. 'National' identity, perceived fairness and organizational commitment in a Hong Kong context: A test of mediation effects. *The International Journal of Human Resource Management*, 23: 4166-4191.
- Einarsen, S., Hoel, H., & Notelaers, G. 2009. Measuring exposure to bullying and harassment at work: Validity, factor structure and psychometric properties of the negative acts questionnaire-revised. *Work & Stress*, 23: 24-44.
- Ellis, A. P. J., Humphrey, S. E., Conlon, D. E., & Tinsley, C. H. 2006. Improving customer reactions to electronic brokered ultimatums: The benefits of prior experience and explanations. *Journal of Applied Social Psychology*, 36: 2293-2324.
- Erdogan, B., & Bauer, T. N. 2010. Differentiated leader-member exchanges: The buffering role of justice climate. *Journal of Applied Psychology*, 95: 1104.
- Erdogan, B., & Liden, R. C. 2006. Collectivism as a moderator of responses to organizational justice: Implications for leader-member exchange and ingratiation. *Journal of Organizational Behavior*, 27: 1-17.
- Erdogan, B., Liden, R. C., & Kraimer, M. L. 2006. Justice and leader-member exchange: The moderating role of organizational culture. *Academy of Management Journal*, 49: 395-406.
- Eschleman, K. J., Bowling, N. A., & Lahuis, D. 2015. The moderating effects of personality on the relationship between change in work stressors and change in counterproductive work behaviours. *Journal of Occupational & Organizational Psychology*, 88: 656-678.
- Espinoza, J. A. 2016. *Goal alignment: Construct development and measurement of a moderator of commitment*. Electronic Thesis and Dissertion Repository, 3966.
- Farh, C. I. C., & Chen, Z. 2014. Beyond the individual victim: Multilevel consequences of abusive supervision in teams. *Journal of Applied Psychology*, 99: 1074-1095.
- Farmer, S. J., Beehr, T. A., & Love, K. G. 2003. Becoming an undercover police officer: A note on fairness perceptions, behavior, and attitudes. *Journal of Organizational Behavior*, 24: 373-387.
- Ferguson, M., Carlson, D., Hunter, E. M., & Whitten, D. 2012. A two-study examination of work-family conflict, production deviance and gender. *Journal of Vocational Behavior*, 81: 245-258.
- Ferris, D. L., Brown, D. J., Berry, J. W., & Lian, H. 2008. The development and validation of the workplace ostracism scale. *Chinese Journal of Clinical Psychology*, 93: 1348-1366.
- Ferris, D. L., Brown, D. J., & Heller, D. 2009. Organizational supports and organizational deviance: The mediating role of organization-based self-esteem. *Organizational Behavior & Human Decision Processes*, 108: 279-286.

- Ferris, D. L., Lian, H., Brown, D. J., & Morrison, R. 2015. Ostracism, self-esteem, and job performance: When do we self-verify and when do we self-enhance? *Academy of Management Journal*, 58: 279-297.
- Ferris, D. L., Rosen, C. R., Johnson, R. E., Brown, D. J., Risavy, S. D., & Heller, D. 2011. Approach or avoidance (or both?): Integrating core self-evaluations within an approach/avoidance framework. *Personnel Psychology*, 64: 137-161.
- Fida, R., Paciello, M., Barbaranelli, C., Tramontano, C., & Fontaine, R. G. 2014. The role of irritability in the relation between job stressors, emotional reactivity, and counterproductive work behaviour. *European Journal of Work & Organizational Psychology*, 23: 31-47.
- Fields, D., Pang, M., & Chiu, C. 2000. Distributive and procedural justice as predictors of employee outcomes in Hong Kong. *Journal of Organizational Behavior*, 21: 547-562.
- Foley, S., Hang-Yue, N., & Wong, A. 2005. Perceptions of discrimination and justice. *Group & Organization Management*, 30: 421-450.
- Fox, S., Spector, P. E., Goh, A., Bruursema, K., & Kessler, S. R. 2012. The deviant citizen: Measuring potential positive relations between counterproductive work behaviour and organizational citizenship behaviour. *Journal of Occupational & Organizational Psychology*, 85: 199-220.
- Fox, S., Spector, P. E., & Miles, D. 2001. Counterproductive work behavior (CWB) in response to job stressors and organizational justice: Some mediator and moderator tests for autonomy and emotions. *Journal of Vocational Behavior*, 59: 291-309.
- Frazier, M. L., Johnson, P. D., Gavin, M., Gooty, J., & Snow, D. B. 2010. Organizational justice, trustworthiness, and trust: A multifoci examination. *Group & Organization Management*, 35: 39-76.
- Frenkel, S., Restubog, S. L. D., & Bednall, T. 2012. How employee perceptions of hr policy and practice influence discretionary work effort and co-worker assistance: Evidence from two organizations. *The International Journal of Human Resource Management*, 23: 4193-4210.
- Fuchs, S., & Edwards, M. R. 2012. Predicting pro-change behaviour: The role of perceived organisational justice and organisational identification. *Human Resource Management Journal*, 22: 39-59.
- Fuller, J. B., Marler, L. E., & Hester, K. 2006. Promoting felt responsibility for constructive change and proactive behavior: Exploring aspects of an elaborated model of work design. *Journal of Organizational Behavior*, 27: 1089-1120.
- Gallus, J. A., Bunk, J. A., Matthews, R. A., Barnes-Farrell, J. L., & Magley, V. J. 2014. An eye for an eye? Exploring the relationship between workplace incivility experiences and perpetration. *Journal of Occupational Health Psychology*, 19: 143-154.
- Galperin, B. L. 2012. Exploring the nomological network of workplace deviance: Developing and validating a measure of constructive deviance. *Journal of Applied Social Psychology*, 42: 2988-3025.
- Gaudet, M.-C., Tremblay, M., & Doucet, O. 2014. Exploring the black box of the contingent reward leadership-performance relationship: The role of perceived justice and emotional exhaustion. *European Journal of Work and Organizational Psychology*, 23: 897-914.

- Geenen, B., Proost, K., Dijke, M. V., Witte, K. D., & Grumbkow, J. V. 2012. The role of affect in the relationship between distributive justice expectations and applicants' recommendation and litigation intentions. *International Journal of Selection & Assessment*, 20: 404–413.
- George, J. M. 1991. State or trait: Effects of positive mood on prosocial behaviors at work. *Journal of Applied Psychology*, 76: 299-307.
- Glomb, T. M., & Liao, H. 2003. Interpersonal aggression in work groups: Social influence, reciprocal, and individual effects. *Academy of Management Journal*, 46: 486-496.
- Goldenhar, L. M., Swanson, N. G., Jr, H. J., Ruder, A., & Deddens, J. 1998. Stressors and adverse outcomes for female construction workers. *Journal of Occupational Health Psychology*, 3: 19-32.
- Goldman, B. M. 2001. Toward an understanding of employment discrimination claiming: An integration of organizational justice and social information processing theories. *Personnel Psychology*, 54: 361-386.
- Gonzalez-Mulé, E., Degeest, D. S., Kiersch, C. E., & Mount, M. K. 2013. Gender differences in personality predictors of counterproductive behavior. *Journal of Managerial Psychology*, 28: 333-353.
- Gordon, M. E., & Bowlby, R. L. 1988. Propositions about grievance settlements: Finally, consultation with grievants. *Personnel Psychology*, 41: 107-123.
- Greenberg, L., & Barling, J. 1999. Predicting employee aggression against coworkers, subordinates and supervisors: The roles of person behaviors and perceived workplace factors. *Journal of Organizational Behavior*, 20: 897-913.
- Gruys, M. L., Stewart, S. M., & Bowling, N. A. 2010. Choosing to report: Characteristics of employees who report the counterproductive work behavior of others. *International Journal of Selection and Assessment*, 18: 439-446.
- Guo, C., & Giacobbe-Miller, J. K. 2012. Understanding survivors' reactions to downsizing in China. *Journal of Managerial Psychology*, 27: 27-47.
- Gupta, V., & Singh, S. 2013. An empirical study of the dimensionality of organizational justice and its relationship with organizational citizenship behaviour in the Indian context. *The International Journal of Human Resource Management*, 24: 1277-1299.
- Halbesleben, J. R., & Bowler, W. M. 2007. Emotional exhaustion and job performance: The mediating role of motivation. *Journal of Applied Psychology*, 92: 93-106.
- Halbesleben, J. R. B., & Wheeler, A. R. 2011. I owe you one: Coworker reciprocity as a moderator of the day-level exhaustion–performance relationship. *Journal of Organizational Behavior*, 32: 608-626.
- Harris, K. J., Andrews, M. C., & Kacmar, K. M. 2007. The moderating effects of justice on the relationship between organizational politics and workplace attitudes. *Journal of Business and Psychology*, 22: 135-144.
- Harris, K. J., Harvey, P., Harris, R. B., & Cast, M. 2013. An Investigation of Abusive Supervision, Vicarious Abusive Supervision, and Their Joint Impacts. *Journal of Social Psychology*, 153: 38-50.
- Harvey, P., Harris, K. J., Gillis, W. E., & Martinko, M. J. 2014. Abusive supervision and the

- entitled employee. *The Leadership Quarterly*, 25: 204-217.
- Hauge, L. J., Skogstad, A., & Einarsen, S. 2009. Individual and situational predictors of workplace bullying: Why do perpetrators engage in the bullying of others? *Work & Stress*, 23: 349-358.
- Hauge, L. J., Skogstad, A., & Einarsen, S. 2011. Role stressors and exposure to workplace bullying: Causes or consequences of what and why? *European Journal of Work and Organizational Psychology*, 20: 610-630.
- Hausknecht, J. P., Sturman, M. C., & Roberson, Q. M. 2011. Justice as a dynamic construct: Effects of individual trajectories on distal work outcomes. *Journal of Applied Psychology*, 96: 872-880.
- Haynie, J. J., Cullen, K. L., Lester, H. F., Winter, J., & Svyantek, D. J. 2014. Differentiated leader-member exchange, justice climate, and performance: Main and interactive effects. *The Leadership Quarterly*, 25: 912-922.
- Heck, A. K., Bedeian, A. G., & Day, D. V. 2005. Mountains out of molehills? Tests of the mediating effects of self-esteem in predicting workplace complaining. *Journal of Applied Social Psychology*, 35: 2262-2289.
- Herscovis, M. S., Turner, N., Barling, J., Arnold, K. A., Dupré, K. E., Inness, M., LeBlanc, M. M., & Sivanathan, N. 2007. Predicting workplace aggression: A meta-analysis. *Journal of Applied Psychology*, 92: 228-238.
- Heslin, P. A., & VandeWalle, D. 2011. Performance appraisal procedural justice: The role of a manager's implicit person theory. *Journal of Management*, 37: 1694-1718.
- Hitlan, R. 2009. The influence of workplace exclusion and personality on counterproductive work behaviours: An interactionist perspective. *European Journal of Work & Organizational Psychology*, 18: 477-502.
- Holtz, B. C. 2015. From first impression to fairness perception: Investigating the impact of initial trustworthiness beliefs. *Personnel Psychology*, 68: 499-546.
- Holtz, B. C., & Harold, C. M. 2008. When your boss says no! The effects of leadership style and trust on employee reactions to managerial explanations. *Journal of Occupational and Organizational Psychology*, 81: 777-802.
- Holtz, B. C., & Harold, C. M. 2009. Fair today, fair tomorrow? A longitudinal investigation of overall justice perceptions. *Journal of Applied Psychology*, 94: 1185-1199.
- Holtz, B. C., & Harold, C. M. 2013a. Effects of leadership consideration and structure on employee perceptions of justice and counterproductive work behavior. *Journal of Organizational Behavior*, 34: 492-519.
- Holtz, B. C., & Harold, C. M. 2013b. Interpersonal justice and deviance: The moderating effects of interpersonal justice values and justice orientation. *Journal of Management*, 39: 339-365.
- Hoobler, J. M., & Brass, D. J. 2006. Abusive supervision and family undermining as displaced aggression. *Journal of Applied Psychology*, 91: 1125-1133.
- Hovorka-Mead, A. D., Ross, W. H., Whipple, T., & Renchin, M. B. 2002. Watching the detectives: Seasonal student employee reactions to electronic monitoring with and without advance notification. *Personnel Psychology*, 55: 329-362.

- Howard, L. W. 1999. Validity evidence for measures of procedural/distributive justice and pay/benefit satisfaction. *Journal of Business and Psychology*, 14: 135-147.
- Howard, L. W., & Cordes, C. L. 2010. Flight from unfairness: Effects of perceived injustice on emotional exhaustion and employee withdrawal. *Journal of Business and Psychology*, 25: 409-428.
- Hu, Y.-L., Hung, C.-H., & Ching, G. C. 2017. Shifting between counterproductive work behavior and organizational citizenship behavior: The effects of workplace support and engagement. *International Journal of Research Studies in Education*, 6: 37-56.
- Humphrey, S. E., Ellis, A. P., Conlon, D. E., & Tinsley, C. H. 2004. Understanding customer reactions to brokered ultimatums: Applying negotiation and justice theory. *Journal of Applied Psychology*, 89: 466-482.
- Hung, T. K., Chi, N. W., & Lu, W. L. 2009. Exploring the relationships between perceived coworker loafing and counterproductive work behaviors: The mediating role of a revenge motive. *Journal of Business & Psychology*, 24: 257-270.
- Huo, W., Luo, J., & Tam, K. L. 2014. Idiosyncratic deals and good citizens in China: The role of traditionality for recipients and their coworkers. *The International Journal of Human Resource Management*, 25: 3157-3177.
- Inness, M., Barling, J., & Turner, N. 2005. Understanding supervisor-targeted aggression: A within-person, between-jobs design. *Journal of Applied Psychology*, 90: 731-739.
- Jaarsveld, D. V., & Walker, D. D. 2008. Getting even for customer mistreatment: The role of moral identity in the relationship between customer interpersonal injustice and employee sabotage. *Journal of Applied Psychology*, 93: 1335-1347.
- Jackson, E. M., & Johnson, R. E. 2012. When opposites do (and do not) attract: Interplay of leader and follower self-identities and its consequences for leader-member exchange. *The Leadership Quarterly*, 23: 488-501.
- Jaewon, L., & Corbett, J. M. 2006. The impact of downsizing on employees' affective commitment. *Journal of Managerial Psychology*, 21: 176-199.
- Janssen, J., Müller, P. A., & Greifeneder, R. 2011. Cognitive processes in procedural justice judgments: The role of ease-of-retrieval, uncertainty, and experience. *Journal of Organizational Behavior*, 32: 726-750.
- Janssen, O., Lam, C. K., & Huang, X. 2010. Emotional exhaustion and job performance: The moderating roles of distributive justice and positive affect. *Journal of Organizational Behavior*, 31: 787-809.
- Jawahar, I. M., & Stone, T. H. 2011. Fairness perceptions and satisfaction with components of pay satisfaction. *Journal of Managerial Psychology*, 26: 297-312.
- Jensen, J. M., & Raver, J. L. 2012. When self-management and surveillance collide. *Group & Organization Management*, 37: 308-346.
- Jensen, J. M., & Ryan, A. M. 2010. Psychological contracts and counterproductive work behaviors: Employee responses to transactional and relational breach. *Journal of Business and Psychology*, 25: 555-568.
- Jepsen, D. M., & Rodwell, J. J. 2009. Justice in the workplace: The centrality of social versus

- judgmental predictors of performance varies by gender. *The International Journal of Human Resource Management*, 20: 2066-2083.
- Jiang, J. Y., & Law, K. S. 2013. Two parallel mechanisms of the relationship between justice perceptions and employees' citizenship behaviour: A comparison of the organizational identification and social exchange perspective. *European Journal of Work and Organizational Psychology*, 22: 423-435.
- Johan Hauge, L., Skogstad, A., & Einarsen, S. 2007. Relationships between stressful work environments and bullying: Results of a large representative study. *Work & Stress*, 21: 220-242.
- Johnson, R. E., & Chang, C.-H. 2006. "I" is to continuance as "we" is to affective: The relevance of the self-concept for organizational commitment. *Journal of Organizational Behavior*, 27: 549-570.
- Johnson, R. E., & Chang, C.-H. 2008. Relationships between organizational commitment and its antecedents: Employee self-concept matters. *Journal of Applied Social Psychology*, 38: 513-541.
- Johnson, R. E., Lanaj, K., & Barnes, C. M. 2014. The good and bad of being fair: Effects of procedural and interpersonal justice behaviors on regulatory resources. *Journal of Applied Psychology*, 99: 635-650.
- Johnson, S. J., Holdsworth, L., Hoel, H., & Zapf, D. 2013. Customer stressors in service organizations: The impact of age on stress management and burnout. *European Journal of Work and Organizational Psychology*, 22: 318-330.
- Jones, D. A. 2009. Getting even with one's supervisor and one's organization: Relationships among types of injustice, desires for revenge, and counterproductive work behaviors. *Journal of Organizational Behavior*, 30: 525-542.
- Jones, D. A., & Martens, M. L. 2009. The mediating role of overall fairness and the moderating role of trust certainty in justice-criteria relationships: The formation and use of fairness heuristics in the workplace. *Journal of Organizational Behavior*, 30: 1025-1051.
- Joy, V. L., & Witt, L. A. 1992. Delay of gratification as a moderator of the procedural justice distributive justice relationship. *Group & Organization Management*, 17: 297-308.
- Judge, T. A., & Colquitt, J. A. 2004. Organizational justice and stress: The mediating role of work-family conflict. *Journal of Applied Psychology*, 89: 395-404.
- Judge, T. A., Scott, B. A., & Ilies, R. 2006. Hostility, job attitudes, and workplace deviance: Test of a multilevel model. *Journal of Applied Psychology*, 91: 126-138.
- Julie, C., & Lars, V. 2008. Procedural justice criteria in salary determination. *Journal of Managerial Psychology*, 23: 713-740.
- Kamdar, D., Mcallister, D. J., & Turban, D. B. 2006. "All in a day's work": How follower individual differences and justice perceptions predict OCB role definitions and behavior. *Journal of Applied Psychology*, 91: 841-855.
- Kaptein, M. 2008. Developing a measure of unethical behavior in the workplace: A stakeholder perspective. *Journal of Management Official Journal of the Southern Management Association*, 34: 978-1008.

- Karriker, J. H., & Williams, M. L. 2009. Organizational justice and organizational citizenship behavior: A mediated multifoci model. *Journal of Management*, 35: 112-135.
- Keeping, L. M., & Levy, P. E. 2000. Performance appraisal reactions: Measurement, modeling, and method bias. *Journal of Applied Psychology*, 85: 708-723.
- Kelloway, E. K., Francis, L., Catano, V. M., & Dupre, K. E. 2008. Third-party support for strike action. *Journal of Applied Psychology*, 93: 806-817.
- Kernan, M. C., & Hanges, P. J. 2002. Survivor reactions to reorganization: Antecedents and consequences of procedural, interpersonal, and informational justice. *Journal of Applied Psychology*, 87: 916-928.
- Kessler, S. R., Spector, P. E., Chang, C.-H., & Parr, A. D. 2008. Organizational violence and aggression: Development of the three-factor violence climate survey. *Work & Stress*, 22: 108-124.
- Khan, A. K., Quratulain, S., & Crawshaw, J. R. 2013. The mediating role of discrete emotions in the relationship between injustice and counterproductive work behaviors: A study in Pakistan. *Journal of Business and Psychology*, 28: 49-61.
- Khan, A. K., Quratulain, S., & M. Bell, C. 2014. Episodic envy and counterproductive work behaviors: Is more justice always good? *Journal of Organizational Behavior*, 35: 128-144.
- Khatri, N., Fern, C. T., & Budhwar, P. 2001. Explaining employee turnover in an Asian context. *Human Resource Management Journal*, 11: 54-74.
- Kickul, J., Lester, S. W., & Finkl, J. 2002. Promise breaking during radical organizational change: Do justice interventions make a difference? *Journal of Organizational Behavior*, 23: 469-488.
- Kiewitz, C., Restubog, S. L. D., Zagenczyk, T. J., Scott, K. D., Garcia, P. R. J. M., & Tang, R. L. 2012. Sins of the parents: Self-control as a buffer between supervisors' previous experience of family undermining and subordinates' perceptions of abusive supervision. *The Leadership Quarterly*, 23: 869-882.
- Kiffin-Petersen, S. A., Jordan, C. L., & Soutar, G. N. 2011. The big five, emotional exhaustion and citizenship behaviors in service settings: The mediating role of emotional labor. *Personality & Individual Differences*, 50: 43-48.
- Klein, D. J., & Verbeke, W. 1999. Autonomic feedback in stressful environments: How do individual differences in autonomic feedback relate to burnout, job performance, and job attitudes in salespeople? *Journal of Applied Psychology*, 84: 911-924.
- Kluemper, D. H., DeGroot, T., & Choi, S. 2013. Emotion management ability: Predicting task performance, citizenship, and deviance. *Journal of Management*, 39: 878-905.
- Kohan, A., & Mazmanian, D. 2003. Police work, burnout, and pro-organizational behavior: A consideration of daily work experiences. *Criminal Justice and Behavior*, 30: 559-583.
- Konovsky, M. A., & Pugh, S. D. 1994. Citizenship behavior and social exchange. *Academy of Management Journal*, 37: 656-669.
- Krings, F., & Facchin, S. 2009. Organizational justice and men's likelihood to sexually harass: The moderating role of sexism and personality. *Journal of Applied Psychology*, 94: 501-510.
- Kristof-Brown, A., Barrick, M. R., & Franke, M. 2002. Applicant impression management:

- Dispositional influences and consequences for recruiter perceptions of fit and similarity. *Journal of Management*, 28: 27-46.
- Kuvaas, B. 2006. Work performance, affective commitment, and work motivation: The roles of pay administration and pay level. *Journal of Organizational Behavior*, 27: 365-385.
- Kwon, S., Kim, M. S., Kang, S.-C., & Kim, M. U. 2008. Employee reactions to gainsharing under seniority pay systems: The mediating effect of distributive, procedural, and interactional justice. *Human Resource Management*, 47: 757-775.
- Kwon, S., & Weingart, L. R. 2004. Unilateral concessions from the other party: Concession behavior, attributions, and negotiation judgments. *Journal of Applied Psychology*, 89: 263-278.
- Lai, J. Y., Lam, L. W., & Lam, S. S. 2013. Organizational citizenship behavior in work groups: A team cultural perspective. *Journal of Organizational Behavior*, 34: 1039-1056.
- Lam, S. S., Schaubroeck, J., & Aryee, S. 2002. Relationship between organizational justice and employee work outcomes: A cross-national study. *Journal of Organizational Behavior*, 23: 1-18.
- Lam, S. S. K., Yik, M. S. M., & Schaubroeck, J. 2002. Responses to formal performance appraisal feedback: The role of negative affectivity. *Journal of Applied Psychology*, 87: 192-201.
- Lang, J., Bliese, P. D., Lang, J. W., & Adler, A. B. 2011. Work gets unfair for the depressed: Cross-lagged relations between organizational justice perceptions and depressive symptoms. *Journal of Applied Psychology*, 96: 602-618.
- Latham, G. P., & Skarlicki, D. P. 1995. Criterion-related validity of the situational and patterned behavior description interviews with organizational citizenship behavior. *Human Performance*, 8: 67-80.
- Lau, D. C., Lam, L. W., & Wen, S. S. 2014. Examining the effects of feeling trusted by supervisors in the workplace: A self-evaluative perspective. *Journal of Organizational Behavior*, 35: 112-127.
- Lavelle, J. J., Brockner, J., Konovsky, M. A., Price, K. H., Henley, A. B., Taneja, A., & Vinekar, V. 2009. Commitment, procedural fairness, and organizational citizenship behavior: A multifoci analysis. *Journal of Organizational Behavior*, 30: 337-357.
- Lee, C., & Farh, J. L. 1999. The effects of gender in organizational justice perception. *Journal of organizational behavior*, 20: 133-143.
- Lee, K., & Allen, N. J. 2002. Organizational citizenship behavior and workplace deviance: The role of affect and cognitions. *Journal of Applied Psychology*, 87: 131-142.
- Lemoine, G. J., Parsons, C. K., & Kansara, S. 2015. Above and beyond, again and again: Self-regulation in the aftermath of organizational citizenship behaviors. *Journal of Applied Psychology*, 100: 40-55.
- Levine, E. L., Xu, X., Yang, L.-Q., Ispas, D., Pitariu, H. D., Bian, R., Ding, D., Capotescu, R., Che, H., & Musat, S. 2011. Cross-national explorations of the impact of affect at work using the state-trait emotion measure: A coordinated series of studies in the United States, China, and Romania. *Human Performance*, 24: 405-442.



- Li, B. 2003. Second language acquisition: An introductory course (review). *Language*, 79: 438-438.
- Li, N.-q., & Yi, X.-n. 2012. An empirical study on organizational justice, abusive supervision and job burnout. *Science and Technology and Management*, 12: 46-49.
- Lian, H., Ferris, D. L., & Brown, D. J. 2012a. Does power distance exacerbate or mitigate the effects of abusive supervision? It depends on the outcome. *Journal of Applied Psychology*, 97: 107-123.
- Lian, H., Ferris, D. L., & Brown, D. J. 2012b. Does taking the good with the bad make things worse? How abusive supervision and leader-member exchange interact to impact need satisfaction and organizational deviance. *Organizational Behavior & Human Decision Processes*, 117: 41-52.
- Lian, H., Brown, D. J., Ferris, D. L., Liang, L. H., Keeping, L. M., & Morrison, R. 2014. Abusive supervision and retaliation: A self-control framework. *Academy of Management Journal*, 57: 116-139.
- Liao, H. 2007. Do it right this time: The role of employee service recovery performance in customer-perceived justice and customer loyalty after service failures. *Journal of Applied Psychology*, 92: 475-489.
- Liao, H., Joshi, A., & Chuang, A. 2004. Sticking out like a sore thumb: Employee dissimilarity and deviance at work. *Personnel Psychology*, 57: 969-1000.
- Liden, R. C., Wayne, S. J., Meuser, J. D., Hu, J., Wu, J., & Liao, C. 2015. Servant leadership: Validation of a short form of the SL-28. *The Leadership Quarterly*, 26: 254-269.
- Lim, S., & Tai, K. 2014. Family incivility and job performance: A moderated mediation model of psychological distress and core self-evaluation. *Journal of Applied Psychology*, 99: 351-359.
- Lim, V. K. G. 2002. The IT way of loafing on the job: Cyberloafing, neutralizing and organizational justice. *Journal of Organizational Behavior*, 23: 675-694.
- Lipponen, J., Wisse, B., & Perälä, J. 2011. Perceived justice and group identification. *Journal of Personnel Psychology*, 10: 13-23.
- Little, L. M., Nelson, D. L., Wallace, J. C., & Johnson, P. D. 2011. Integrating attachment style, vigor at work, and extra-role performance. *Journal of Organizational Behavior*, 32: 464-484.
- Liu, C., Nauta, M. M., Spector, P. E., & Li, C. 2008. Direct and indirect conflicts at work in China and the US: A cross-cultural comparison. *Work & Stress*, 22: 295-313.
- Liu, J., Kwan, H. K., Fu, P. P., & Mao, Y. 2013. Ethical leadership and job performance in China: The roles of workplace friendships and traditionality. *Journal of Occupational and Organizational Psychology*, 86: 564-584.
- Liu, J., Kwan, H. K., Wu, L. Z., & Wu, W. K. 2010. Abusive supervision and subordinate supervisor-directed deviance: The moderating role of traditional values and the mediating role of revenge cognitions. *Journal of Occupational and Organizational Psychology*, 83: 835-856.
- Liu, N.-T., & Ding, C. G. 2012. General ethical judgments, perceived organizational support,

- interactional justice, and workplace deviance. *The International Journal of Human Resource Management*, 23: 2712-2735.
- Liu, S., Luksyte, A., Zhou, L., Shi, J., & Wang, M. 2015. Overqualification and counterproductive work behaviors: Examining a moderated mediation model. *Journal of Organizational Behavior*, 36: 250-271.
- Liu, X.-Y., & Wang, J. 2013. Abusive supervision and organizational citizenship behaviour: Is supervisor-subordinate guanxi a mediator? *The International Journal of Human Resource Management*, 24: 1471-1489.
- Liu, Y., Wang, M., Chang, C. H., Shi, J., Zhou, L., & Shao, R. 2015. Work-family conflict, emotional exhaustion, and displaced aggression toward others: The moderating roles of workplace interpersonal conflict and perceived managerial family support. *Journal of Applied Psychology*, 100: 793-808.
- Loi, R., Hang-Yue, N., & Foley, S. 2006. Linking employees' justice perceptions to organizational commitment and intention to leave: The mediating role of perceived organizational support. *Journal of Occupational and Organizational Psychology*, 79: 101-120.
- Loi, R., Yang, J., & Diefendorff, J. M. 2009. Four-factor justice and daily job satisfaction: A multilevel investigation. *Journal of Applied Psychology*, 94: 770-781.
- Luksyte, A., Avery, D. R., & Yeo, G. 2015. It is worse when you do it: Examining the interactive effects of coworker presenteeism and demographic similarity. *Journal of Applied Psychology*, 100: 1107-1123.
- Luo, Y. 2007. The independent and interactive roles of procedural, distributive, and interactional justice in strategic alliances. *Academy of Management Journal*, 50: 644-664.
- Marcus, B., Schuler, H., Quell, P., & Hümpfner, G. 2002. Measuring counterproductivity: Development and initial validation of a German self-report questionnaire. *International Journal of Selection and Assessment*, 10: 18-35.
- Martín-Tapia, I., Aragón-Correa, J. A., & Guthrie, J. P. 2009. High performance work systems and export performance. *International Journal of Human Resource Management*, 20: 633-653.
- Masterson, S. S., Lewis, K., Goldman, B. M., & Taylor, M. S. 2000. Integrating justice and social exchange: The differing effects of fair procedures and treatment on work relationships. *Academy of Management Journal*, 43: 738-748.
- Matta, F. K., Scott, B. A., Koopman, J., & Conlon, D. E. 2015. Does seeing "eye to eye" affect work engagement and organizational citizenship behavior? A role theory perspective on lmx agreement. *Academy of Management Journal*, 58: 1686-1708.
- Mawritz, M. B., Mayer, D. M., Hoobler, J. M., Wayne, S. J., & Marinova, S. V. 2012. A trickle-down model of abusive supervision. *Personnel Psychology*, 65: 325-357.
- Mayer, D., Nishii, L., Schneider, B., & Goldstein, H. 2007. The precursors and products of justice climates: Group leader antecedents and employee attitudinal consequences. *Personnel Psychology*, 60: 929-963.
- Mayer, D. M., Greenbaum, R. L., Kuenzi, M., & Shteynberg, G. 2009. When do fair procedures

- not matter? A test of the identity violation effect. *Journal of Applied Psychology*, 94: 142-161.
- Mayer, D. M., Thau, S., Workman, K. M., Van Dijke, M., & De Cremer, D. 2012. Leader mistreatment, employee hostility, and deviant behaviors: Integrating self-uncertainty and thwarted needs perspectives on deviance. *Organizational Behavior and Human Decision Processes*, 117: 24-40.
- McAllister, D. J., Kamdar, D., Morrison, E. W., & Turban, D. B. 2007. Disentangling role perceptions: How perceived role breadth, discretion, instrumentality, and efficacy relate to helping and taking charge. *Journal of Applied Psychology*, 92: 1200-1211.
- McNall, L. A., & Roch, S. G. 2007. Effects of electronic monitoring types on perceptions of procedural justice, interpersonal justice, and privacy. *Journal of Applied Social Psychology*, 37: 658-682.
- Meier, L. L., & Spector, P. E. 2013. Reciprocal effects of work stressors and counterproductive work behavior: A five-wave longitudinal study. *Journal of Applied Psychology*, 98: 529-539.
- Melkonian, T., Monin, P., & Noorderhaven, N. G. 2011. Distributive justice, procedural justice, exemplarity, and employees' willingness to cooperate in M&A integration processes: An analysis of the air france-klm merger. *Human Resource Management*, 50: 809-837.
- Meurs, J. A., Fox, S., Kessler, S. R., & Spector, P. E. 2013. It's all about me: The role of narcissism in exacerbating the relationship between stressors and counterproductive work behaviour. *Work & Stress*, 27: 368-382.
- Meyer, J. P., Stanley, L. J., & Parfyonova, N. M. 2012. Employee commitment in context: The nature and implication of commitment profiles ☆. *Journal of Vocational Behavior*, 80: 1-16.
- Miles, J. A., & Klein, H. J. 1998. The fairness of assigning group members to tasks. *Group & Organization Management*, 23: 71-96.
- Miller, B. K. 2015. Entitlement and conscientiousness in the prediction of organizational deviance. *Personality & Individual Differences*, 82: 114-119.
- Miller, B. K., Konopaske, R., & Byrne, Z. S. 2012. Dominance analysis of two measures of organizational justice. *Journal of Managerial Psychology*, 27: 264-282.
- Miner, K. N., Settles, I. H., Pratt-Hyatt, J. S., & Brady, C. C. 2012. Experiencing incivility in organizations: The buffering effects of emotional and organizational support. *Journal of Applied Social Psychology*, 42: 340-372.
- Mitchell, M. S., & Ambrose, M. L. 2007. Abusive supervision and workplace deviance and the moderating effects of negative reciprocity beliefs. *Journal of Applied Psychology*, 92: 1159-1168.
- Mitchell, M. S., & Ambrose, M. L. 2012. Employees' behavioral reactions to supervisor aggression: An examination of individual and situational factors. *Journal of Applied Psychology*, 97: 1148-1170.
- Mitchell, M. S., Vogel, R. M., & Folger, R. 2015. Third parties' reactions to the abusive supervision of coworkers. *Journal of Applied Psychology*, 100: 1040-1055.

- Moliner, C., Martínez-Tur, V., Ramos, J., Peiró, J. M., & Cropanzano, R. 2008. Organizational justice and extrarole customer service: The mediating role of well-being at work. *European Journal of Work and Organizational Psychology*, 17: 327-348.
- Moon, H., Kamdar, D., Mayer, D. M., & Takeuchi, R. 2008. Me or we? The role of personality and justice as other-centered antecedents to innovative citizenship behaviors within organizations. *Journal of Applied Psychology*, 93: 84-94.
- Moorman, R. H. 1991. Relationship between organizational justice and organizational citizenship behaviors: Do fairness perceptions influence employee citizenship? *Journal of applied psychology*, 76: 845-855.
- Moorman, R. H., & Blakely, G. L. 1995. Individualism-collectivism as an individual difference predictor of organizational citizenship behavior. *Journal of Organizational Behavior*, 16: 127-142.
- Moorman, R. H., Blakely, G. L., & Niehoff, B. P. 1998. Does perceived organizational support mediate the relationship between procedural justice and organizational citizenship behavior? *Academy of Management Journal*, 41: 351-357.
- Mount, M., Ilies, R., & Johnson, E. 2006. Relationship of personality traits and counterproductive work behaviors: The mediating effects of job satisfaction. *Personnel Psychology*, 59: 591-622.
- Murphy, S. M., Wayne, S. J., Liden, R. C., & Erdogan, B. 2003. Understanding social loafing: The role of justice perceptions and exchange relationships. *Human Relations*, 56: 61-84.
- Naumann, S. E., & Bennett, N. 2000. A case for procedural justice climate: Development and test of a multilevel model. *Academy of Management Journal*, 43: 881-889.
- Niehoff, B. P., & Moorman, R. H. 1993. Justice as a mediator of the relationship between methods of monitoring and organizational citizenship behavior. *Academy of Management Journal*, 36: 527-556.
- Nina, D. C., & Douglas, H. F. 2004. Perceptions of distributive and procedural justice in employee benefits: Flexible versus traditional benefit plans. *Journal of Managerial Psychology*, 19: 19-40.
- Noblet, A., Maharee-Lawler, S., & Rodwell, J. 2012. Using job strain and organizational justice models to predict multiple forms of employee performance behaviours among Australian policing personnel. *The International Journal of Human Resource Management*, 23: 3009-3026.
- Norriswatts, C., & Levy, P. E. 2004. The mediating role of affective commitment in the relation of the feedback environment to work outcomes. *Journal of Vocational Behavior*, 65: 351-365.
- Notelaers, G., De Witte, H., & Einarsen, S. 2010. A job characteristics approach to explain workplace bullying. *European Journal of Work and Organizational Psychology*, 19: 487-504.
- Ogunfowora, B. 2009. *The consequences of ethical leadership: Comparisons with transformational leadership and abusive supervision*. Unpublished doctoral dissertation, University of Calgary, Canada.

- Oh, I. S., Charlier, S. D., Mount, M. K., & Berry, C. M. 2014. The two faces of high self-monitors: Chameleonic moderating effects of self-monitoring on the relationships between personality traits and counterproductive work behaviors. *Social Science Electronic Publishing*, 35: 92–111.
- Ong, L. D., & Tay, A. 2015. *The effects of co-workers' social undermining behaviour on employees' work behaviours*. In: GAI Istanbul International Academic Conference Proceedings, 07-10 June 2015, Istanbul, Turkey.
- Paglis, L. L., & Green, S. G. 2002. Both sides now: Supervisor and subordinate perspectives on relationship quality. *Journal of Applied Social Psychology*, 32: 250-276.
- Parker, C. P., Baltes, B. B., & Christiansen, N. D. 1997. Support for affirmative action, justice perceptions, and work attitudes: A study of gender and racial-ethnic group differences. *Journal of Applied Psychology*, 82: 376-389.
- Peng, H. 2012. Counterproductive work behavior among Chinese knowledge workers. *International Journal of Selection and Assessment*, 20: 119-138.
- Penhaligon, N. L., Louis, W. R., & Restubog, S. L. D. 2013. Feeling left out? The mediating role of perceived rejection on workgroup mistreatment and affective, behavioral, and organizational outcomes and the moderating role of organizational norms. *Journal of Applied Social Psychology*, 43: 480-497.
- Penney, L. M., & Spector, P. E. 2005. Job stress, incivility, and counterproductive work behavior (CWB): The moderating role of negative affectivity. *Journal of Organizational Behavior*, 26: 777-796.
- Piccolo, R. F., Bardes, M., Mayer, D. M., & Judge, T. A. 2008. Does high quality leader–member exchange accentuate the effects of organizational justice? *European Journal of Work and Organizational Psychology*, 17: 273-298.
- Pierce, C. A., Karl, K. A., & Brey, E. T. 2012. Role of workplace romance policies and procedures on job pursuit intentions. *Journal of Managerial Psychology*, 27: 237-263.
- Posthuma, R. A., & Campion, M. A. 2005. When do multiple dimensions of procedural justice predict agreement to publicly endorse your employer in recruitment advertisements? *Journal of Occupational and Organizational Psychology*, 78: 431-452.
- Posthuma, R. A., Maertz, C. P., & Dworkin, J. B. 2007. Procedural justice's relationship with turnover: Explaining past inconsistent findings. *Journal of Organizational Behavior*, 28: 381-398.
- Qin, X., Ren, R., Zhang, Z. X., & Johnson, R. E. 2015. Fairness heuristics and substitutability effects: Inferring the fairness of outcomes, procedures, and interpersonal treatment when employees lack clear information. *Journal of Applied Psychology*, 100: 749-766.
- Rafferty, A. E., & Restubog, S. L. D. 2011. The influence of abusive supervisors on followers' organizational citizenship behaviours: The hidden costs of abusive supervision. *British Journal of Management*, 22: 270-285.
- Rafferty, A. E., Restubog, S. L. D., & Jimmieson, N. L. 2010. Losing sleep: Examining the cascading effects of supervisors' experience of injustice on subordinates' psychological health. *Work & Stress*, 24: 36-55.

- Raja, U., & Johns, G. 2010. The joint effects of personality and job scope on in-role performance, citizenship behaviors, and creativity. *Human Relations*, 63: 981-1005.
- Randall, M. L., Cropanzano, R., Bormann, C. A., & Birjulin, A. 1999. Organizational politics and organizational support as predictors of work attitudes, job performance, and organizational citizenship behavior. *Journal of Organizational Behavior*, 20: 159-174.
- Redman, T., Hamilton, P., Malloch, H., & Kleymann, B. 2011. Working here makes me sick! The consequences of sick building syndrome. *Human Resource Management Journal*, 21: 14-27.
- Redman, T., Snape, E., & Ashurst, C. 2009. Location, location, location: Does place of work really matter? *British Journal of Management*, 20: S171-S181.
- Restubog, S. L. D., Bordia, P., & Tang, R. L. 2010. Behavioural outcomes of psychological contract breach in a non-western culture: The moderating role of equity sensitivity. *British Journal of Management*, 18: 376-386.
- Restubog, S. L. D., Scott, K. L., & Zagencyk, T. J. 2011. When distress hits home: The role of contextual factors and psychological distress in predicting employees' responses to abusive supervision. *Journal of Applied Psychology*, 96: 713-729.
- Rhee, J., Park, T., & Hwang, S. H. 2011. Non-regular professionals' dual commitment in South Korea: Antecedents and consequences. *The International Journal of Human Resource Management*, 22: 612-631.
- Richmanhirsch, W. L., Olsonbuchanan, J. B., & Drasgow, F. 2000. Examining the impact of administration medium on examinee perceptions and attitudes. *Journal of Applied Psychology*, 85: 880-887.
- Rioux, S. M., & Penner, L. A. 2001. The causes of organizational citizenship behavior: A motivational analysis. *Journal of Applied Psychology*, 86: 1306-1314.
- Robbins, T., Summers, T. P., & Miller, J. L. 2000. Intra-and inter-justice relationships: Assessing the direction. *Human Relations*, 53: 1329-1355.
- Rodell, J. B., & Colquitt, J. A. 2009. Looking ahead in times of uncertainty: The role of anticipatory justice in an organizational change context. *Journal of Applied Psychology*, 94: 989-1002.
- Rosen, C. C., Chang, C. H., Johnson, R. E., & Levy, P. E. 2009. Perceptions of the organizational context and psychological contract breach: Assessing competing perspectives. *Organizational Behavior & Human Decision Processes*, 108: 202-217.
- Rosen, C. C., Harris, K. J., & Kacmar, K. M. 2011. Lmx, context perceptions, and performance: An uncertainty management perspective. *Journal of Management*, 37: 819-838.
- Rospenda, K. 2002. Workplace harassment, services utilization, and drinking outcomes. *Journal of Occupational Health Psychology*, 7: 141-155.
- Rospenda, K. M., Richman, J. A., Ehmke, J. L. Z., & Zlatoper, K. W. 2005. Is workplace harassment hazardous to your health? *Journal of Business and Psychology*, 20: 95-110.
- Ross, W. H., Brantmeier, C., & Ciriacks, T. 2002. The impact of hybrid dispute-resolution procedures on constituent fairness judgments. *Journal of Applied Social Psychology*, 32: 1151-1188.

- Rousseau, V., Salek, S., Aube, C., & Morin, E. M. 2009. Distributive justice, procedural justice, and psychological distress: The moderating effect of coworker support and work autonomy. *Journal of Occupational Health Psychology*, 14: 305-317.
- Ruiz-Quintanilla, S. A., & Blanco, D. 1996. Open door policies: Measuring impact using attitude surveys. *Human Resource Management*, 35: 269-291.
- Rupp, D. E., & Cropanzano, R. 2002. The mediating effects of social exchange relationships in predicting workplace outcomes from multifoci organizational justice. *Organizational Behavior and Human Decision Processes*, 89: 925-946.
- Ruth, K., & Jürgen, D. 2009. Organizational justice and managerial commitment in corporate mergers. *Journal of Managerial Psychology*, 24: 29-45.
- Saks, A. M. 2006. Antecedents and consequences of employee engagement. *Journal of Managerial Psychology*, 21: 600-619.
- Sayers, J. K., Sears, K. L., Kelly, K. M., & Harbke, C. R. 2011. When employees engage in workplace incivility: The interactive effect of psychological contract violation and organizational justice. *Employee Responsibilities and Rights Journal*, 23: 269-283.
- Scandura, T. A. 1997. Mentoring and organizational justice: An empirical investigation. *Journal of Vocational Behavior*, 51: 58-69.
- Schappe, S. P. 1998. Understanding employee job satisfaction: The importance of procedural and distributive justice. *Journal of Business and Psychology*, 12: 493-503.
- Schat, A. C., & Kelloway, E. K. 2000. Effects of perceived control on the outcomes of workplace aggression and violence. *Journal of Occupational Health Psychology*, 5: 386-402.
- Schaubroeck, J., & Fink, L. S. 1998. Facilitating and inhibiting effects of job control and social support on stress outcomes and role behavior: A contingency model. *Journal of Organizational Behavior*, 19: 167-195.
- Schminke, M., Ambrose, M. L., & Noel, T. W. 1997. The effect of ethical frameworks on perceptions of organizational justice. *Academy of Management Journal*, 40: 1190-1207.
- Schminke, M., Cropanzano, R., & Rupp, D. E. 2002. Organization structure and fairness perceptions: The moderating effects of organizational level. *Organizational Behavior and Human Decision Processes*, 89: 881-905.
- Scott, B. A., & Colquitt, J. A. 2007. Are organizational justice effects bounded by individual differences? An examination of equity sensitivity, exchange ideology, and the big five. *Group & Organization Management*, 32: 290-325.
- Scott, B. A., Colquitt, J. A., & Zapata-Phelan, C. P. 2007. Justice as a dependent variable: Subordinate charisma as a predictor of interpersonal and informational justice perceptions. *Journal of Applied Psychology*, 92: 1597-1609.
- Selvarajan, T. T., & Cloninger, P. A. 2012. Can performance appraisals motivate employees to improve performance? A Mexican study. *The International Journal of Human Resource Management*, 23: 3063-3084.
- Semmer, N. K., Jacobshagen, N., Meier, L. L., Elfering, A., Beehr, T. A., Kälin, W., & Tschann, F. 2015. Illegitimate tasks as a source of work stress. *Work & Stress*, 29: 32-56.
- Shao, P., Resick, C. J., & Hargis, M. B. 2011. Helping and harming others in the workplace: The

- roles of personal values and abusive supervision. *Human Relations*, 64: 1051-1078.
- Shin, Y., Du, J., & Jin, N. C. 2015. Multi-level longitudinal dynamics between procedural justice and interpersonal helping in organizational teams. *Journal of Business & Psychology*, 30: 513-528.
- Shoss, M. K., Eisenberger, R., Restubog, S. L. D., & Zagenczyk, T. J. 2013. Blaming the organization for abusive supervision: The roles of perceived organizational support and supervisor's organizational embodiment. *Journal of Applied Psychology*, 98: 158-168.
- Simons, T., & Roberson, Q. 2003. Why managers should care about fairness: The effects of aggregate justice perceptions on organizational outcomes. *Journal of Applied Psychology*, 88: 432-443.
- Sinclair, R. R., Martin, J. E., & Croll, L. W. 2002. A threat-appraisal perspective on employees' fears about antisocial workplace behavior. *Journal of Occupational Health Psychology*, 7: 37-56.
- Singh, B., Winkel, D. E., & Selvarajan, T. T. 2013. Managing diversity at work: Does psychological safety hold the key to racial differences in employee performance? *Journal of Occupational and Organizational Psychology*, 86: 242-263.
- Skarlicki, D. P., Barclay, L. J., & Pugh, D. S. 2008. When explanations for layoffs are not enough: Employer's integrity as a moderator of the relationship between informational justice and retaliation. *Journal of Occupational and Organizational Psychology*, 81: 123-146.
- Skarlicki, D. P., & Folger, R. 1997. Retaliation in the workplace: The roles of distributive, procedural, and interactional justice. *Journal of Applied Psychology*, 82: 734-443.
- Skarlicki, D. P., Folger, R., & Tesluk, P. 1999. Personality as a moderator in the relationship between fairness and retaliation. *Academy of Management Journal*, 42: 100-108.
- Skarlicki, D. P., & Latham, G. P. 1996. Increasing citizenship behavior within a union: A test of organizational justice theory. *Journal of Applied Psychology*, 81: 161-169.
- Skogstad, A., Einarsen, S., Torsheim, T., Aasland, M. S., & Hetland, H. 2007. The destructiveness of laissez-faire leadership behavior. *Journal of Occupational Health Psychology*, 12: 80-92.
- Smither, J. W., Reilly, R. R., Millsap, R. E., AT&T, K. P., & Stoffey, R. W. 1993. Applicant reactions to selection procedures. *Personnel Psychology*, 46: 49-76.
- Smithikrai, C. 2010. Counterproductive behaviour at work: An investigation into reduction strategies. *International Journal of Human Resource Management*, 21: 1272-1288.
- Somers, M. J., & Birnbaum, D. 1998. Work-related commitment and job performance: It's also the nature of the performance that counts. *Journal of Organizational Behavior*, 19: 621-634.
- Spector, P. E., Fox, S., Penney, L. M., Bruursema, K., Goh, A., & Kessler, S. 2006. The dimensionality of counterproductivity: Are all counterproductive behaviors created equal? *Journal of Vocational Behavior*, 68: 446-460.
- Spector, P. E., & Zhou, Z. E. 2014. The moderating role of gender in relationships of stressors and personality with counterproductive work behavior. *Journal of Business & Psychology*, 29: 669-681.



- Spell, C. S., & Arnold, T. 2007a. An appraisal perspective of justice, structure, and job control as antecedents of psychological distress. *Journal of Organizational Behavior*, 28: 729-751.
- Spell, C. S., & Arnold, T. J. 2007b. A multi-level analysis of organizational justice climate, structure, and employee mental health†. *Journal of Management*, 33: 724-751.
- Spitzmüller, C., & Stanton, J. M. 2006. Examining employee compliance with organizational surveillance and monitoring. *Journal of Occupational and Organizational Psychology*, 79: 245-272.
- Spreitzer, G. M., & Mishra, A. K. 2002. To stay or to go: Voluntary survivor turnover following an organizational downsizing. *Journal of Organizational Behavior*, 23: 707-729.
- Stamper, C. L., & Masterson, S. S. 2002. Insider or outsider? How employee perceptions of insider status affect their work behavior. *Journal of Organizational Behavior*, 23: 875-894.
- Stouten, J., Dijke, M. V., Mayer, D. M., Cremer, D. D., & Euwema, M. C. 2013. Can a leader be seen as too ethical? The curvilinear effects of ethical leadership. *The Leadership Quarterly*, 24: 680-695.
- Sulea, C., Fine, S., Fischmann, G., Sava, F. A., & Dumitru, C. 2013. Abusive supervision and counterproductive work behaviors: The moderating effects of personality. *Journal of Personnel Psychology*, 12: 196-200.
- Sweeney, P. D., & Mcfarlin, D. B. 1993. Workers' evaluations of the "ends" and the "means": An examination of four models of distributive and procedural justice. *Organizational Behavior and Human Decision Processes*, 55: 23-40.
- Takeuchi, R., Bolino, M. C., & Lin, C. C. 2015. Too many motives? The interactive effects of multiple motives on organizational citizenship behavior. *Journal of Applied Psychology*, 100: 1239-1248.
- Taylor, S. G., & Kluemper, D. H. 2012. Linking perceptions of role stress and incivility to workplace aggression: The moderating role of personality. *Journal of Occupational Health Psychology*, 17: 316-329.
- Taylor, S. G., Kluemper, D. H., & Sauley, K. S. 2009. Equity sensitivity revisited: Contrasting unidimensional and multidimensional approaches. *Journal of Business & Psychology*, 24: 299-314.
- Tekleab, A. G., Bartol, K. M., & Liu, W. 2005. Is it pay levels or pay raises that matter to fairness and turnover? *Journal of Organizational Behavior*, 26: 899-921.
- Tepper, B. J. 2000. Consequences of abusive supervision. *Academy of Management Journal*, 43: 178-190.
- Tepper, B. J., Carr, J. C., Breaux, D. M., Geider, S., Hu, C. Y., & Hua, W. 2009. Abusive supervision, intentions to quit, and employees' workplace deviance: A power/dependence analysis. *Organizational Behavior and Human Decision Processes*, 109: 156-167.
- Tepper, B. J., Duffy, M. K., & Shaw, J. D. 2001. Personality moderators of the relationship between abusive supervision and subordinates' resistance. *Journal of Applied Psychology*, 86: 974-983.
- Tepper, B. J., Henle, C. A., Lambert, L. S., Giacalone, R. A., & Duffy, M. K. 2008. Abusive supervision and subordinates' organization deviance. *Journal of Applied Psychology*, 93:

721-732.

Tepper, B. J., Lockhart, D., & Hoobler, J. 2001. Justice, citizenship, and role definition effects. *Journal of Applied Psychology*, 86: 789-796.

Tepper, B. J., Moss, S. E., Lockhart, D. E., & Carr, J. C. 2007. Abusive supervision, upward maintenance communication, and subordinates' psychological distress. *Academy of Management Journal*, 50: 1169-1180.

Thau, S., Aquino, K., & Poortvliet, P. M. 2007. Self-defeating behaviors in organizations: The relationship between thwarted belonging and interpersonal work behaviors. *Journal of Applied Psychology*, 92: 840-847.

Thau, S., Aquino, K., & Wittek, R. 2007. An extension of uncertainty management theory to the self: The relationship between justice, social comparison orientation, and antisocial work behaviors. *Journal of Applied Psychology*, 92: 250-258.

Thau, S., Bennett, R. J., Mitchell, M. S., & Marrs, M. B. 2009. How management style moderates the relationship between abusive supervision and workplace deviance: An uncertainty management theory perspective. *Organizational Behavior & Human Decision Processes*, 108: 79-92.

Thau, S., & Mitchell, M. S. 2010. Self-gain or self-regulation impairment? Tests of competing explanations of the supervisor abuse and employee deviance relationship through perceptions of distributive justice. *Journal of Applied Psychology*, 95: 1009-1031.

Thiel, C. E., Hill, J., Griffith, J. A., & Connelly, S. 2014. Political tactics as affective events: Implications for individual perception and attitude. *European Journal of Work and Organizational Psychology*, 23: 419-434.

Thomas, M. B., Cynthia, L., Yongqing, F., & Jianfeng, L. 2002. Power distance as a moderator of the relationship between justice and employee outcomes in a sample of Chinese employees. *Journal of Managerial Psychology*, 17: 692-711.

Thoroughgood, C. N., Tate, B. W., Sawyer, K. B., & Jacobs, R. 2012. Bad to the bone: Empirically defining and measuring destructive leader behavior. *Journal of Leadership & Organizational Studies*, 19: 230-255.

Tjosvold, D., Wong, A. S. H., & Wan, P. M. K. 2010. Conflict management for justice, innovation, and strategic advantage in organizational relationships. *Journal of Applied Social Psychology*, 40: 636-665.

Tourigny, L., Baba, V. V., Han, J., & Wang, X. 2013. Emotional exhaustion and job performance: The mediating role of organizational commitment. *The International Journal of Human Resource Management*, 24: 514-532.

Tremblay, M., Vandenberghe, C., & Doucet, O. 2013. Relationships between leader-contingent and non-contingent reward and punishment behaviors and subordinates' perceptions of justice and satisfaction, and evaluation of the moderating influence of trust propensity, pay level, and role ambiguity. *Journal of Business and Psychology*, 28: 233-249.

Triana, M. D. C., & García, M. F. 2009. Valuing diversity: A group-value approach to understanding the importance of organizational efforts to support diversity. *Journal of Organizational Behavior*, 30: 941-962.

- Tsai, C.-J., & Wang, W.-L. 2013. Exploring the factors associated with employees' perceived appraisal accuracy: A study of Chinese state-owned enterprises. *The International Journal of Human Resource Management*, 24: 2197-2220.
- Tyler, T. R., & Blader, S. L. 2002. Autonomous vs. Comparative status: Must we be better than others to feel good about ourselves? *Organizational Behavior & Human Decision Processes*, 89: 813-838.
- Umphress, E. E., Bingham, J. B., & Mitchell, M. S. 2010. Unethical behavior in the name of the company: The moderating effect of organizational identification and positive reciprocity beliefs on unethical pro-organizational behavior. *Journal of Applied Psychology*, 95: 769-780.
- van Olffen, W., & de Cremer, D. 2007. Who cares about organizational justice? How personality moderates the effects of perceived fairness on organizational attachment. *European Journal of Work and Organizational Psychology*, 16: 386-406.
- Vogel, R. M., Mitchell, M. S., Tepper, B. J., Restubog, S. L. D., Hu, C., Hua, W., & Huang, J.-C. 2015. A cross-cultural examination of subordinates' perceptions of and reactions to abusive supervision. *Journal of Organizational Behavior*, 36: 720-745.
- Walsh, B. M., Magley, V. J., Reeves, D. W., Davies-Schriels, K. A., Marmet, M. D., & Gallus, J. A. 2012. Assessing workgroup norms for civility: The development of the civility norms questionnaire-brief. *Journal of Business and Psychology*, 27: 407-420.
- Walumbwa, F. O., Cropanzano, R., & Hartnell, C. A. 2009. Organizational justice, voluntary learning behavior, and job performance: A test of the mediating effects of identification and leader-member exchange. *Journal of Organizational Behavior*, 30: 1103-1126.
- Wang, H., Tsui, A. S., & Xin, K. R. 2011. CEO leadership behaviors, organizational performance, and employees' attitudes. *The Leadership Quarterly*, 22: 92-105.
- Wang, W., Mao, J. Y., Wu, W. K., & Liu, J. 2012. Abusive supervision and workplace deviance: the mediating role of interactional justice and the moderating role of power distance. *Asia Pacific Journal of Human Resources*, 50: 43-60.
- Watts, L. L., Frame, M. C., Moffett, R. G., Van Hein, J. L., & Hein, M. 2015. The relationship between gender, perceived career barriers, and occupational aspirations. *Journal of Applied Social Psychology*, 45: 10-22.
- Wayne, S. J., Shore, L. M., Bommer, W. H., & Tetrick, L. E. 2002. The role of fair treatment and rewards in perceptions of organizational support and leader-member exchange. *Journal of Applied Psychology*, 87: 590.
- Webster, J. R., Beehr, T. A., & Christiansen, N. D. 2010. Toward a better understanding of the effects of hindrance and challenge stressors on work behavior. *Journal of Vocational Behavior*, 76: 68-77.
- Wei, F., & Si, S. 2013. Tit for tat? Abusive supervision and counterproductive work behaviors: The moderating effects of locus of control and perceived mobility. *Asia Pacific Journal of Management*, 30: 281-296.
- Westman, M., & Etzion, D. 1999. The crossover of strain from school principals to teachers and vice versa. *Journal of Occupational Health Psychology*, 4: 269-278.

- Wilson, K. S., & Baumann, H. M. 2015. Capturing a more complete view of employees' lives outside of work: The introduction and development of new interrole conflict constructs. *Personnel Psychology*, 68: 235-282.
- Winkel, D. E., Wyland, R. L., Shaffer, M. A., & Clason, P. 2011. A new perspective on psychological resources: Unanticipated consequences of impulsivity and emotional intelligence. *Journal of Occupational & Organizational Psychology*, 84: 78-94.
- Wong, Y.-T., Wong, C.-S., & Ngo, H.-Y. 2012. The effects of trust in organisation and perceived organisational support on organisational citizenship behaviour: A test of three competing models. *The International Journal of Human Resource Management*, 23: 278-293.
- Xu, E., Huang, X., Lam, C. K., & Miao, Q. 2012. Abusive supervision and work behaviors: The mediating role of *lmx*. *Journal of Organizational Behavior*, 33: 531-543.
- Yagil, D. 2006. The relationship of abusive and supportive workplace supervision to employee burnout and upward influence tactics. *Journal of Emotional Abuse*, 6: 49-65.
- Yang, J., & Diefendorff, J. M. 2009. The relations of daily counterproductive workplace behavior with emotions, situational antecedents, and personality moderators: A diary study in Hong Kong. *Personnel Psychology*, 62: 259-295.
- Yang, L.-Q., Johnson, R. E., Zhang, X., Spector, P. E., & Xu, S. 2013. Relations of interpersonal unfairness with counterproductive work behavior: The moderating role of employee self-identity. *Journal of Business and Psychology*, 28: 189-202.
- Ybema, J. F., Hagedoorn, M., & Buunk, B. P. 2002. Collective outcomes and justice considerations in evaluating equalization of a special-education budget. *Journal of Applied Social Psychology*, 32: 570-589.
- Yui-Tim, W., Hang-Yue, N., & Chi-Sum, W. 2002. Affective organizational commitment of workers in Chinese joint ventures. *Journal of Managerial Psychology*, 17: 580-598.
- Yun, S., Takeuchi, R., & Liu, W. 2007. Employee self-enhancement motives and job performance behaviors: Investigating the moderating effects of employee role ambiguity and managerial perceptions of employee commitment. *Journal of Applied Psychology*, 92: 745-756.
- Zagenczyk, T. J., Restubog, S. L. D., Kiewitz, C., Kiazad, K., & Tang, R. L. 2014. Psychological contracts as a mediator between Machiavellianism and employee citizenship and deviant behaviors. *Journal of Management*, 40: 1098-1122.
- Zapata-Phelan, C. P., Colquitt, J. A., Scott, B. A., & Livingston, B. 2009. Procedural justice, interactional justice, and task performance: The mediating role of intrinsic motivation. *Organizational Behavior & Human Decision Processes*, 108: 93-105.
- Zellars, K. L., Tepper, B. J., & Duffy, M. K. 2002. Abusive supervision and subordinates' organizational citizenship behavior. *Journal of Applied Psychology*, 87: 1068-1076.
- Zhang, Y., Farh, J.-L., & Wang, H. 2012. Organizational antecedents of employee perceived organizational support in China: A grounded investigation. *The International Journal of Human Resource Management*, 23: 422-446.
